# Supplementary material for: Naphthalimide-based fluorescent gelator for construction of both organogels and stimuli-responsive metallogels
Source: Royal Society of Chemistry journal article supplement (doi:10.1039/c7ra03184j), 2017-01-01
Supplement: c7ra03184j1.pdf [file c7ra03184j1.pdf]

**Naphthalimide-based fluorescent gelator for construction of both  
organogel and stimuli-responsive metallogel**

Ao zhang, Yan Zhang, Zhice Xu\*, Yajuan Li, Xudong Yu\*, Lijun Geng

Hebei Research Center of Pharmaceutical and Chemical Engineering, and College of  
chemical engineering, Hebei University of Science and Technology, Yuhua Road, 70,  
Shijiazhuang 050080, PR China

E-mail: [chemyxd@163.com](mailto:chemyxd@163.com)

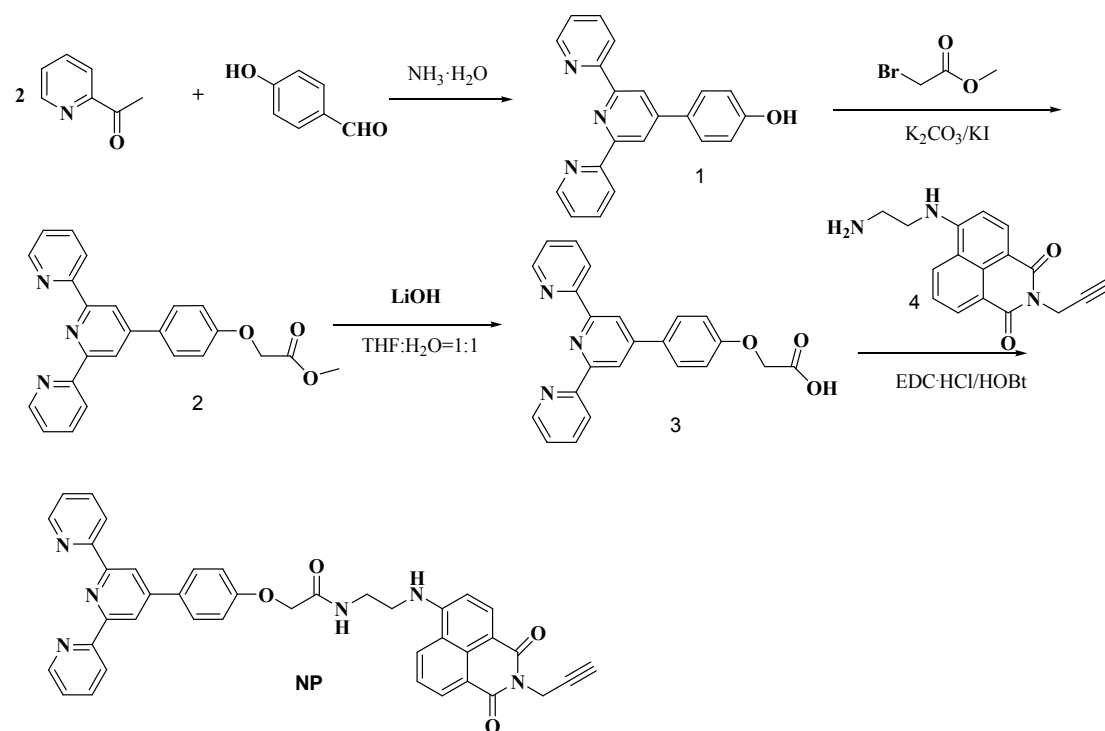

**Scheme 1** the synthesis procedure of NP.

Synthesis of **1** (the synthesis of **1** was prepared from literature: Wang S X, Chu W H, Wang Y C, et al. Appl. Organometal. Chem. 2013, 27, 373-379).

Methyl 2-pyridyl ketone (4.48 g, 3.7 mmol) and KOH (4.2 g) were stirred for 30 min, then hydroxy benzaldehyde (2.44 g, 1.85 mmol) and 50 mL ammonium hydroxide were added. The reaction mixture was refluxed for 10 h, khaki solid (1.97g, yield: 16.35%) was obtained when the mixture was neutralized by HCl.

Synthesis of **2**

Compound **1** (1g, 3.1 mmol), methyl bromoacetate(0.47 g, 3.1 mmol), 0.85 g  $K_2CO_3$ (6.2 mmol) and 0.1 g KI were refluxed in acetone for 10 h. The reaction mixture was concentrated and purified by column chromatography (dichloromethane/methanol, 10/1, v/v), white yellow solid was obtained (0.25 g, 22%).  $^1H$  NMR (500M,  $CDCl_3$ ,  $\delta$ ): 3.84 (s, 3H), 4.72 (s, 2H), 7.03-7.05(d, 2H, J=8.5 Hz), 7.34-7.36 (m, 2H), 7.87-7.89(d, 2H, J=8.5 Hz),8.66-8.72 (m, 6H).

Synthesis of **3**

Compound **2** (0.8 g, 2mmol) and LiOH (0.26 g, 10 mmol) were stirred in solvent mixture of THF and water (50 mL, v:v=1:1) for 72 h, the reaction mixture was concentrated and neutralized by HCl to pH=1-2, the filtrate was directly utilized without further purification (0.16g, yield: 20%).

---

<sup>1</sup>H NMR (500M, CDCl<sub>3</sub>, δ): 4.63(s, 2H), 7.08-7.09(d, 2H, J=8Hz), 7.51-7.54 (m, 2H), 7.87-7.88 (d, 2H, J=8.5 Hz), 8.02-8.05 (m, 2H), 8.66-8.67 (m, 4H), 8.76-8.77 (d, 2H, J=4 Hz).

#### Synthesis of **4**

The synthesis procedure of **4** could be seen from our previous literature 15 in the main context.

#### Synthesis of **NP**

Compound **3** (0.6 g, 1.6 mmol), EDC·HCl (920 mg, 4.8 mmol), HOBT (649 mg, 4.8 mmol), and 3mL Et<sub>3</sub>N were stirred in CHCl<sub>3</sub> for 24 h, then the reaction mixture was concentrated and purified by column chromatography (dichloromethane/methanol, 30/1, v/v), yellow solid was obtained (0.84 g, yield: 81%). Mp: 289-291°C. <sup>1</sup>H NMR (500M, DMSO-*d*<sub>6</sub>, δ): 3.16-3.17 (2H, J=5.5 Hz), 3.51-3.54 (m, 2H), 4.07-4.10 (t, 1H), 4.62-4.63 (d, 2H, J=2 Hz), 4.64 (s, 2H), 6.80-6.90(1H, J=8.5 Hz), 7.13-7.15 (2H, J=8 Hz), 7.52-7.54 (t, 2H, J=5.5 Hz), 7.65-7.69 (t, 1H, J=8.5 Hz), 7.77-7.80(m, 3H), 8.03-8.06(t, 2H, J=7.5 Hz), 8.26-8.28 (d, 1H, J=8.5 Hz), 8.36-8.37(d, 1H, J=7.5 Hz), 8.54-8.57 (m, 2H), 8.66-8.67 (d, 2H, J=8 Hz), 8.75-8.76 (2H, d, J=4.5 Hz). <sup>13</sup>CNMR (125 M, DMSO-*d*<sub>6</sub>): 30.7, 54.9, 115.5, 117.2, 120.9, 124.5, 128.1, 137.5, 142.0, 149.3, 150.9, 155.0, 156.9, 155.5, 158.8, 161.9, 168.4, 206.6. MS calc. for [C<sub>40</sub>H<sub>31</sub>N<sub>6</sub>O<sub>4</sub>+H]<sup>+</sup>: 659.2; Found: 659.3.

Table S1 The gelation properties of NP (25 mg/mL) in organic solvents.

| Solvent           | H-C | U |
|-------------------|-----|---|
| CHCl <sub>3</sub> | I   | I |
| methanol          | I   | I |
| ethanol           | I   | I |
| butanol           | P   | G |
| acetone           | I   | I |
| toluene           | I   | I |
| THF               | P   | G |
| DMSO              | S   | S |
| 1,4-dioxane       | P   | G |
| 2-methoxyethanol  | P   | G |

Table S2 The gelation properties of **NP** (25 mg/mL) upon the addition of metal ions (with molecular ratio of 1:1) in 2-methoxyethanol.

| ions                 | r.t. | H-C |
|----------------------|------|-----|
| CaCl <sub>2</sub>    | I    | G   |
| MgCl <sub>2</sub>    | I    | S   |
| FeCl <sub>2</sub>    | I    | G   |
| Cd(OAc) <sub>2</sub> | G    | G   |
| Cu(OAc) <sub>2</sub> | G    | G   |
| HgCl <sub>2</sub>    | I    | I   |
| CuSO <sub>4</sub>    | I    | G   |
| ZnCl <sub>2</sub>    | I    | I   |

Note: P, precipitate; G, gel; S, solution; I: insoluble;

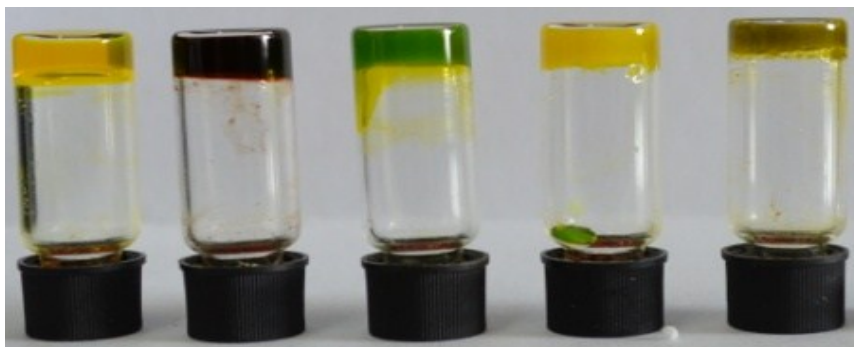

Fig. S1 Photos of the gels in 2-methoxyethanol, from left to right: **NP**/Cd(OAc)<sub>2</sub> metallogel; **NP**/FeCl<sub>2</sub> metallogel; **NP**/Cu(OAc)<sub>2</sub> metallogel; **NP** organogel; **NP**/CuSO<sub>4</sub> metallogel. Molecular ratios of **NP** and metal salts was 1:1.

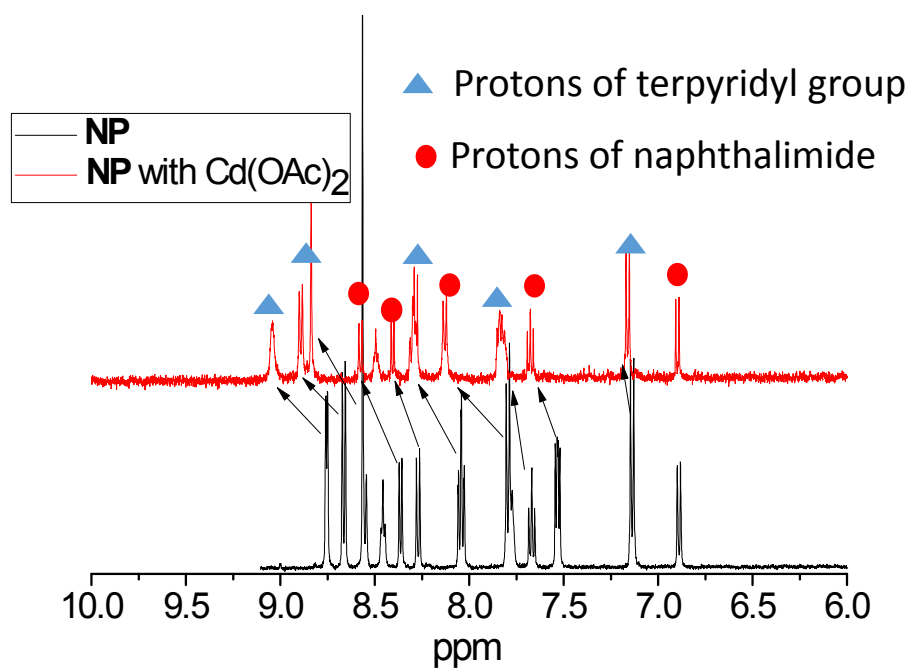

Fig. S2 <sup>1</sup>H NMR spectra of **NP** solution (8 mg/mL) and **NP** solution with the addition of Cd(OAc)<sub>2</sub>. Upon the addition of Cd(OAc)<sub>2</sub>, most Hs of the terpyridine and naphthalimide segment showed downfield shift, indicating the coordination interaction.

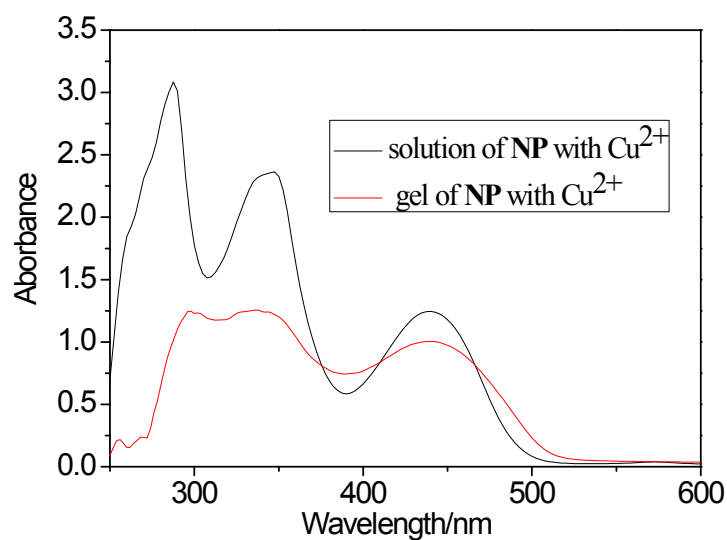

Fig. S3 UV-vis spectra of **NP**/Cu(OAc) gel (**NP**: 25 mg/mL, with molecular ratio of 1:1).

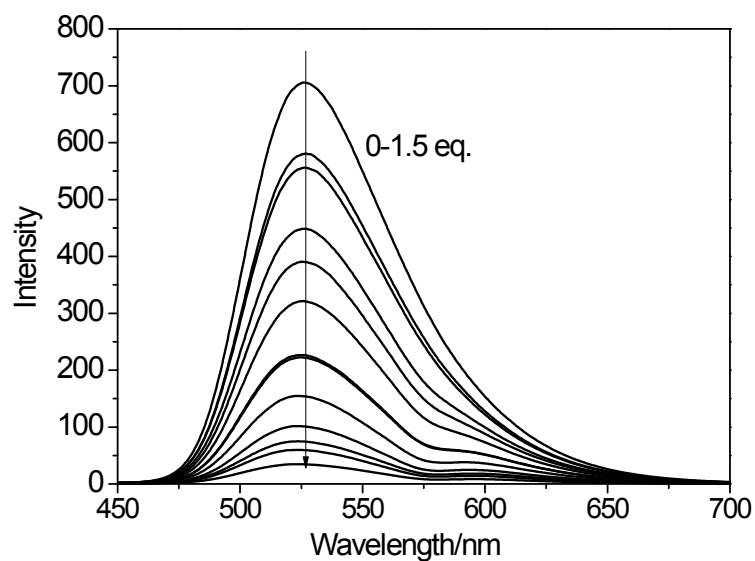

Fig. S4 Fluorescent titrations of NP (10<sup>-5</sup> M) upon the addition of FeCl<sub>2</sub>.

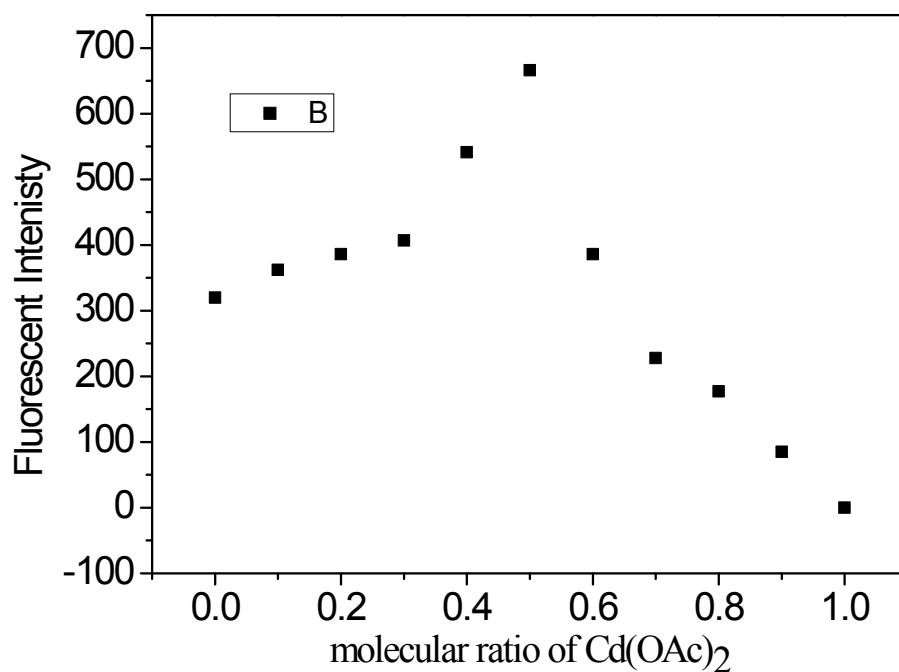

Fig. S5 Job plot experiments of NP with Cd(OAc)<sub>2</sub>, the total concentration of NP and Cd(OAc)<sub>2</sub> was 10<sup>-4</sup> M.

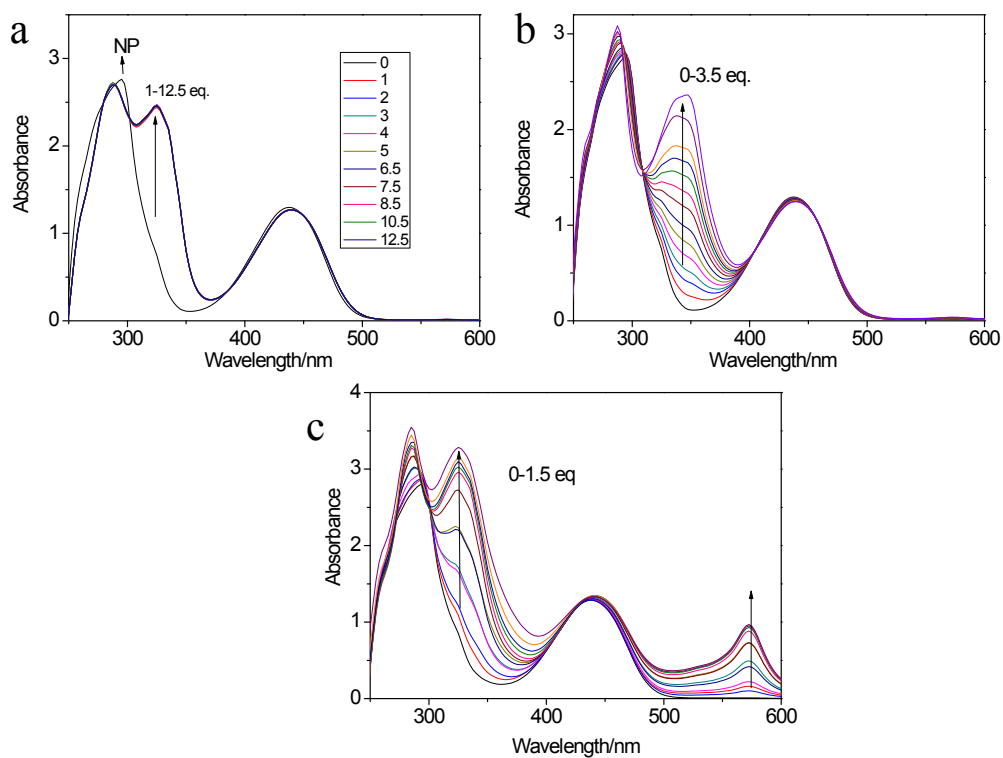

Fig. S6 UV-vis titration of NP upon the addition of metal ions. a) Upon the addition of  $\text{Cd}(\text{OAc})_2$  ion; b) Upon the addition of  $\text{Cu}(\text{OAc})_2$  ion; c) Upon the addition of  $\text{FeCl}_2$  ion.

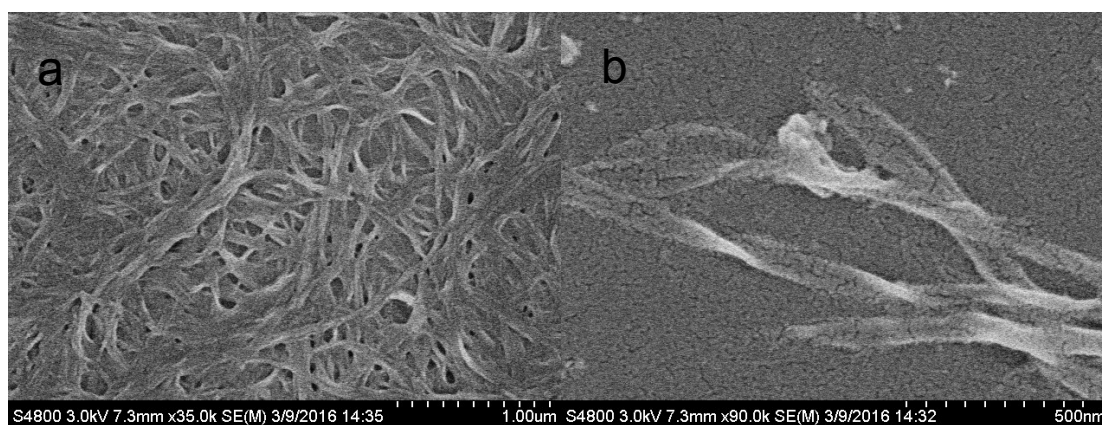

Fig. S7 SEM images of NP xerogel from 1, 4-dioxane. b) was the magnification picture of a).

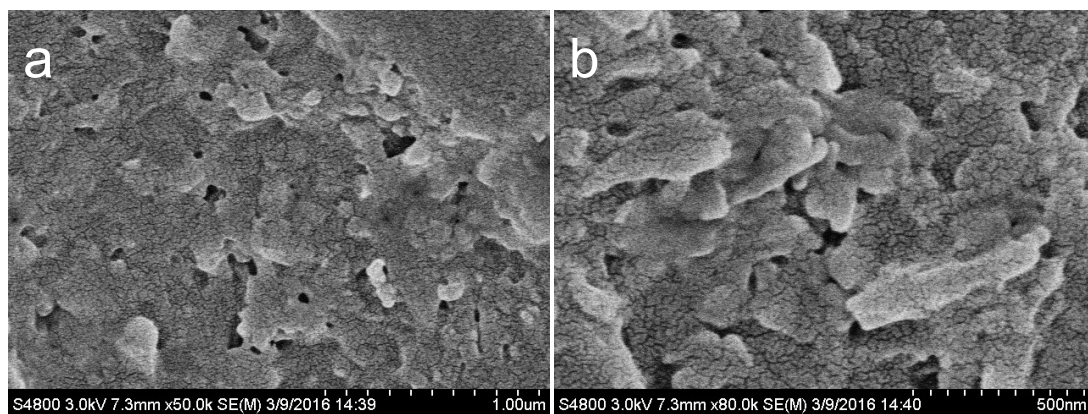

Fig. S8 SEM images of NP xerogel from butanol. b) was the magnification picture of a).

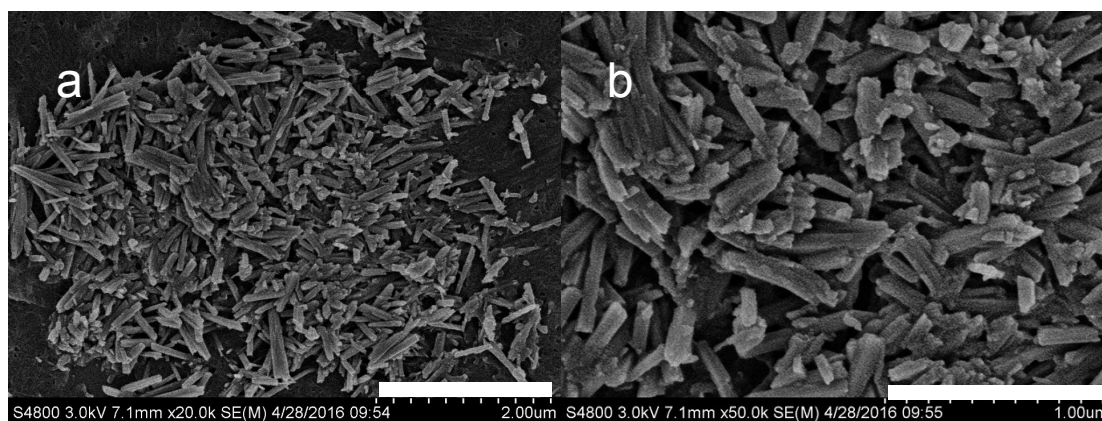

Fig. S9 SEM image of NP/FeCl<sub>2</sub> metallogel. b) was the magnification picture of a). Scale bar: 2 µm; 1 µm.

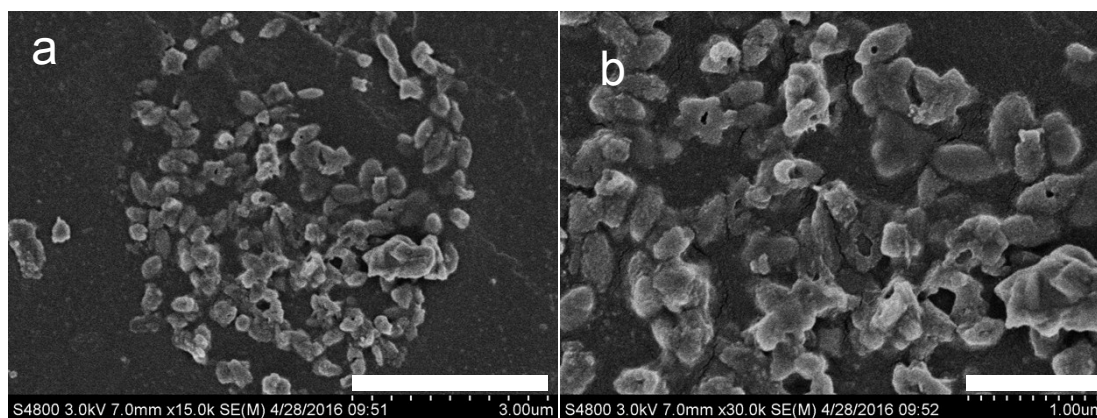

Fig. S10 SEM image of NP/CaCl<sub>2</sub> metallogel. b) was the magnification picture of a).



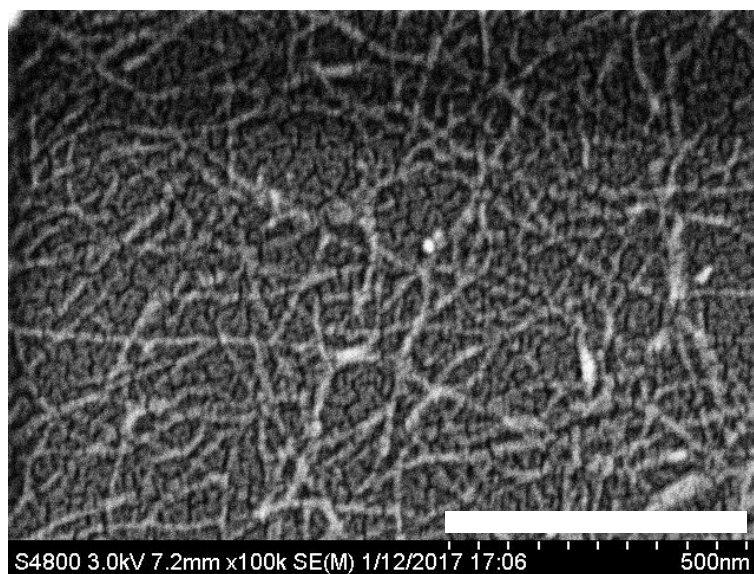

Fig. S11 SEM image of NP/Cu(OAc)<sub>2</sub> metallogel. Scale bar: 500 nm.

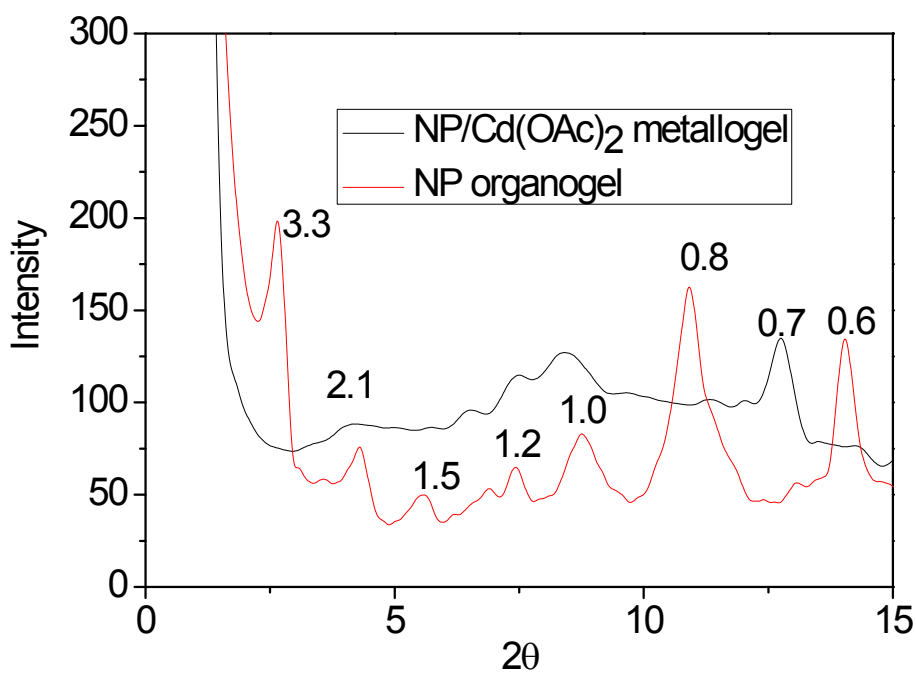

Fig. S12 XRD data of NP organogel and NP/Cd(OAc)<sub>2</sub> metallogel.

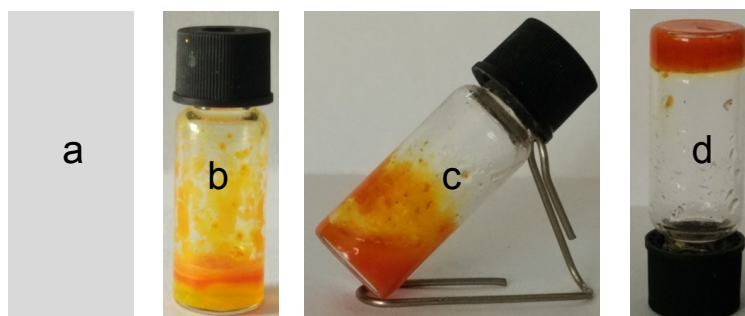

Fig. S13 the reversible phase changes of NP/Cd(OAc)<sub>2</sub> gel controlled by Na<sub>2</sub>S and AgNO<sub>3</sub>. a) NP/Cd(OAc)<sub>2</sub> gel; b) upon the addition of Na<sub>2</sub>S for 10 min; c) upon the addition of Na<sub>2</sub>S for 1 h; d)

upon further addition of  $\text{AgNO}_3$ .

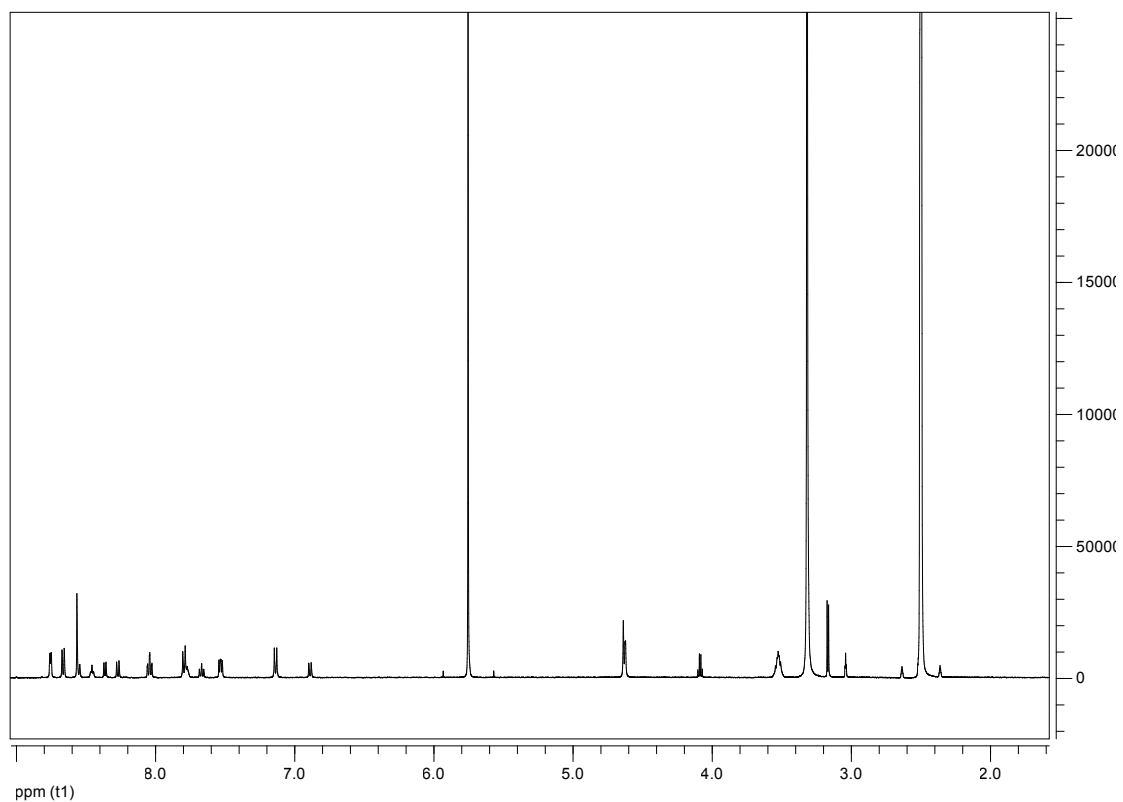

Fig. S14  $^1\text{H}$  NMR spectrum of NP in  $\text{DMSO-}d_6$ .

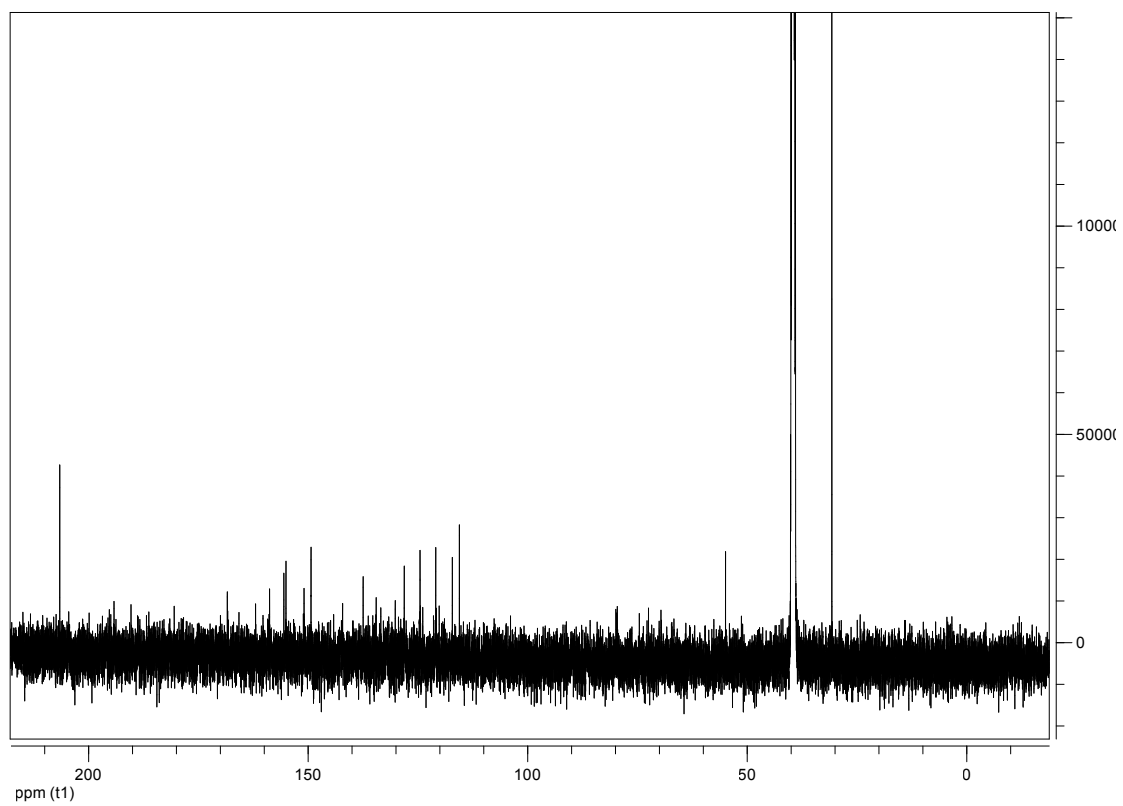

Fig. S15  $^{13}\text{C}$  NMR spectra of NP.

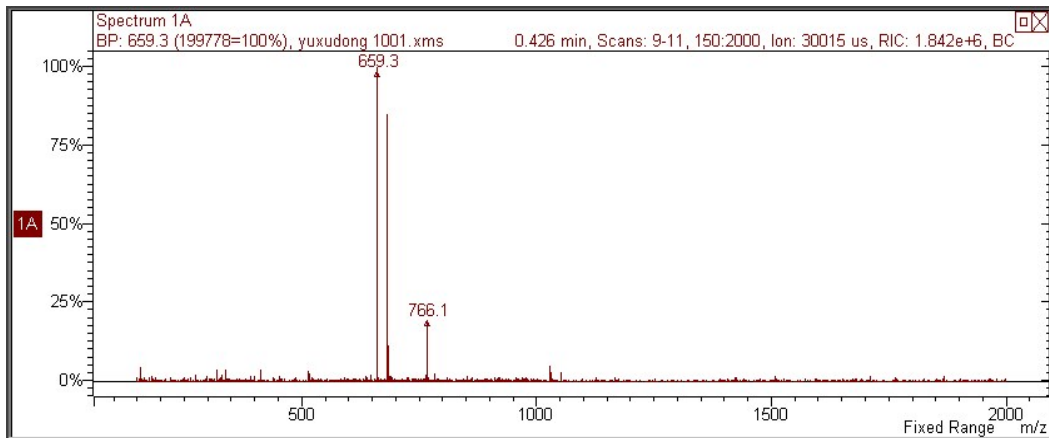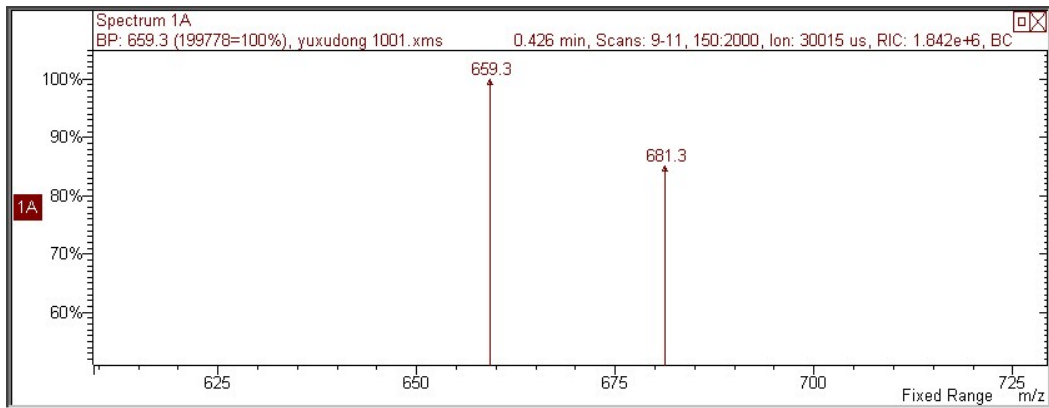

Fig. S16 MS spectrum of NP.
